# Supplementary material
Source: publisher figshare collection journal article supplement (https://acs.figshare.com/ndownloader/files/16442240)
Supplement: Supplementary file 1 [file 16442240]

## Supporting Information for

### Single-, Double-, and Triple-Network Macroporous Rubbers as a Passive Sampler

Berkant YETISKIN<sup>1</sup>, Oktay E. TUREYEN<sup>2</sup>, Atilla YILMAZ<sup>2</sup>, Sevil D. YAKAN<sup>2</sup>, Oya S.

OKAY<sup>2\*</sup>, and Oguz OKAY<sup>1\*</sup>

<sup>1</sup>*Department of Chemistry, Istanbul Technical University, 34469 Maslak, Istanbul, Turkey*

<sup>2</sup>*Department Ocean Engineering, Istanbul Technical University, 34469 Maslak, Istanbul, Turkey.*

Corresponding Authors:

\*(O.O.) E-mail: okayo@itu.edu.tr

\*(O.S.O.) E-mail: oya.okay@itu.edu.tr

## Table of Contents

**Table S1.** Gel fractions  $W_g$  for SN, DN, and TN rubbers formed at various  $w_R$ . S-2

**Figure S1. (a):** Experimental data from naphthalene sorption tests from aqueous solutions during the first 12 h (symbols), and the results of curve fitting using the first (solid curves) and second order sorption kinetics (dashed curves). S-3

**Table S1.** Gel fractions  $W_g$  for SN, DN, and TN rubbers formed at various  $w_R$ .<sup>a</sup>

| Code | $w_R$       | $W_g$       |
|------|-------------|-------------|
| SN   | 0           | 1.0 (0.1)   |
| DN   | 0.45 (0.03) | 1.08 (0.02) |
| DN   | 0.85 (0.05) | 1.03 (0.04) |
| DN   | 1.35 (0.08) | 1.02 (0.01) |
| DN   | 1.9 (0.2)   | 1.02 (0.01) |
| TN   | 4.5 (0.4)   | 0.94 (0.04) |

<sup>a</sup> Standard deviations are in parenthesis.

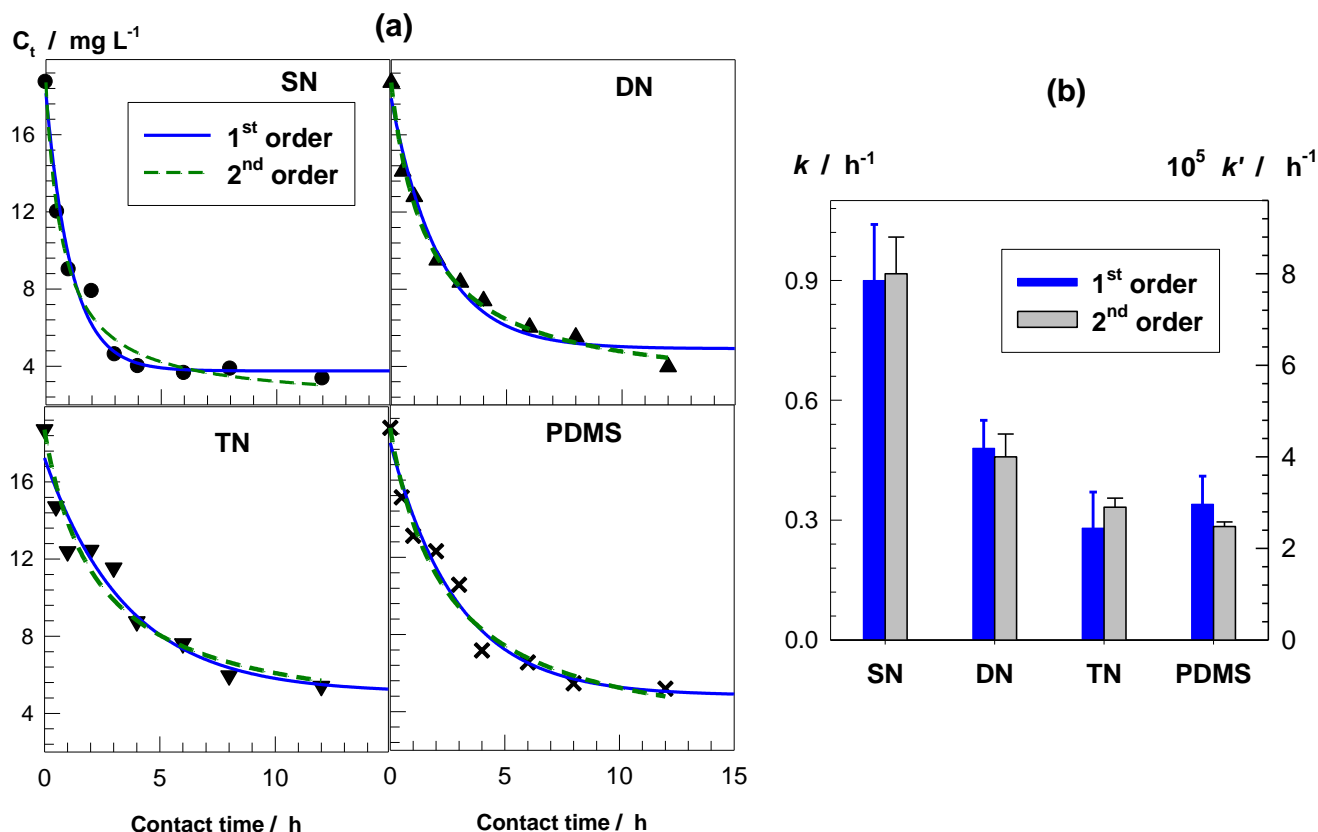

**Figure S1. (a):** Experimental data from naphthalene sorption tests from aqueous solutions during the first 12 h (symbols), and the results of curve fitting using the first (solid curves) and second order sorption kinetics (dashed curves). **(b):** The rate constant  $k$  and  $k'$  of the naphthalene sorption process estimated from 1<sup>st</sup> and 2<sup>nd</sup> order kinetics, respectively, as a function of the type of rubbers.

For the second order kinetics, the equation  $dq_t/dt = k' (q_e - q_t)^2$  was used in the calculations which leads to  $C_t = C_o - t/(a + bt)$  where  $a = (aq_e^2)^{-1}$  and  $b = q_e^{-1}$ .
